# Supplementary material
Source: MDPI journal article supplement (https://www.mdpi.com/2075-163X/12/9/1142)
Supplement: s1 [file s1]

## Supplementary

### S1: Rietveld Refinements

The fundamental parameters approach as implemented in TOPAS is applied for the refinements of X-ray powder data. Parameters of the measurement and the refinement are summarized in chapter 2.3. and Table S1.

**Table S1.** Parameters for XRD measurement and Rietveld refinement.

| Instrumental and Refinement Variables    | Settings and Parameters                                      |
|------------------------------------------|--------------------------------------------------------------|
| Goniometer radius                        | 240 mm                                                       |
| Fixed divergence slit angle              | 0.125°                                                       |
| Antiscattering slit angle                | 0.5°                                                         |
| Sample spinning                          | 1 s                                                          |
| Antiscattering slit angle refracted beam | 7.5°                                                         |
| Background                               | Chebyshev polynomial 4th order, 1/X Bkg                      |
| Detector                                 | Linear PSD                                                   |
| 2Th angular range                        | 3.347° 2θ                                                    |
| Source length                            | 12 mm                                                        |
| RS length                                | 14 mm                                                        |
| Prim./Sec. Soller                        | 0.04 rad (2.3°)                                              |
| LP factor                                | 0                                                            |
| Zero error                               | refined from measurement of silicon standard [37]: −0.001946 |
| sample displacement and sample length:   | refined for each measurement                                 |

Corundum ( $\text{Al}_2\text{O}_3$   $\alpha$ -phase, Alfa Aesar, 99.95%) is used as an internal standard in XRD measurements. Lattice parameters, atomic positions, and isotropic thermal parameters of the corundum powder were refined in a measurement with 10 wt% of the standard reference material  $\text{CeO}_2$  (NIST 674b, Cerac Inc., Milwaukee, WI). The CIF file of  $\text{CeO}_2$  674b determined by Argonne National Laboratory was used for the refinement. The lattice parameter of  $\text{CeO}_2$  was fixed at 5.11153 Å according to the value given in the NIST certificate of analysis [38]. Isotropic temperature factors of Ce and O were calculated from the  $U_{\text{iso}}$  values determined by Marchbank et al. [39] according to:

$$B_{\text{eq}} = U_{\text{iso}} \cdot 8 \cdot \pi^2$$

The resulting values of  $B_{\text{eq}} = 0.26$  for Ce and 0.44 for O were fixed during the refinements. The diffractogram shows no sign of an additional crystalline phase. As the mass absorption coefficient of Ce is very high (301  $\text{cm}^2/\text{g}$ ) microabsorption has to be taken into account [40] by including the Brindley correction in the refinement. The particle radius of corundum was set to 0.25  $\mu\text{m}$  according to the manufacturer data (0.25–0.45  $\mu\text{m}$ ). As the mass absorption coefficient of corundum is only 32  $\text{cm}^2/\text{g}$  the impact of small differences in particle size is small. However, for  $\text{CeO}_2$  the impact of microabsorption on the phase contents is significant. According to the NIST Certificate, a phase purity of 91.36 % is expected, whereas the study of Marchbank et al. [39] evidenced a lower amorphous content of 4.8 %. By assuming an amorphous content of 0.48 wt% in the sample, the particle radius of  $\text{CeO}_2$  has to be 3.4  $\mu\text{m}$  instead of 0.5  $\mu\text{m}$  which was determined in Pederson et al. [40]. The lowering of the particle size results in negative amorphous contents. As this particle radius is much higher than the expected value, corundum is assumed to be completely crystalline. The refined lattice parameters for corundum are  $a = 4.75996$  and  $c = 12.99396$  Å. Only minor differences to the cif file were found in the atomic positions (Al: 0 0 0.35165, O: 0.30813 0 0). The temperature factors are 0.65 for Al and 0.66 for O.

The structural models used in the refinements are listed with their literature references in Table S2. All temperature factors included in the literature data were used for the refinements (except  $U_{\text{elimite}}$ ). If only  $U$  is given these values were transformed into  $B_{\text{eq}}$

according to the equation above. Beq factors were set to 1 if neither B nor U are included in the literature data. Atomic positions and Beq factors were not refined. Lattice parameters were refined in the range of  $\pm 0.05$  for all phases. Larger deviations were allowed only in individual cases after visual inspection. Due to the strong overlap of C<sub>2</sub>S peaks, the lattice parameters of  $\alpha'$ -H-C<sub>2</sub>S were refined only once for the samples synthesized at 800 °C, respectively. In all other refinements, the lattice parameters of  $\alpha'$ -H-C<sub>2</sub>S were fixed to these values to avoid overestimation due to the strong overlap with  $\beta$ -C<sub>2</sub>S.

**Table S2.** Structure models and their parameters used for the Rietveld refinement. MD-March Dolase, sh-spherical harmonics. Column Data shows the radiation type and sample used for data collection (sc-single crystal, pow-powder, X-X-ray, Sy-synchrotron, N-neutron).

| Phase                                            | Space Group               | References                    | Data  | Orientation       |
|--------------------------------------------------|---------------------------|-------------------------------|-------|-------------------|
| <b>Raw materials</b>                             |                           |                               |       |                   |
| $\alpha$ -Quartz                                 | <i>P3<sub>2</sub>21</i>   | Le Page et al. 1976 [41]      | scX   | no                |
| Calcite                                          | <i>R-3cH</i>              | Liu et al. 2014 [42]          | powX  | >10 wt% MD104     |
| 11Å Tobermorite                                  | <i>B11m</i>               | Merlino et al. 2001 [43]      | scX   | MD020, 002        |
| Aragonite                                        | <i>Pmcn</i>               | De Villiers 1971 [44]         | scX   | no                |
| Vaterite                                         | <i>P6<sub>3</sub>/mmc</i> | Kamhi 1961 [45]               | scX   | no                |
| Anhydrite                                        | <i>Amma</i>               | Hawthorne et al. 1975 [46]    | scX   | no                |
| Bassanite                                        | <i>I121</i>               | Ballirano et al. 2001 [47]    | powX  | no                |
| Microcline                                       | <i>C-1</i>                | Allan et al. 1997 [48]        | scX   | MD001             |
| Albite                                           | <i>C-1</i>                | Winter et al. 1979 [49]       | scX   | MD001             |
| Sinjarite                                        | <i>Pbcn</i>               | Leclaire et al. 1977 [50]     | scX   | no                |
| <b>Calcination product</b>                       |                           |                               |       |                   |
| $\alpha'$ -H-C <sub>2</sub> S                    | <i>Pnma</i>               | Mumme et al. 1995 [51]        | powSy | no                |
| $\beta$ -C <sub>2</sub> S                        | <i>P12<sub>1</sub>/n1</i> | Mumme et al. 1995 [51]        | powSy | >20 wt% MD100+010 |
| $\gamma$ -C <sub>2</sub> S                       | <i>Pbnm</i>               | Mumme et al. 1996 [52]        | powN  | no                |
| Ellestadite                                      | <i>P6<sub>3</sub>/m</i>   | Fang et al. 2014 [28]         | powN  | >8 wt% sh4        |
| Mayenite                                         | <i>I-43d</i>              | Galuskin et al. 2012 [53]     | scX   | no                |
| Rusinovite                                       | <i>Cmcm</i>               | Galuskin et al. 2011 [34]     | scX   | no                |
| Rondorfite                                       | <i>Fd-3m</i>              | Ye Ruilun 1987 [54]           | scX   | no                |
| CaCl <sub>2</sub>                                | <i>Pbcn</i>               | Anselment 1985 [55]           | scX   | no                |
| Ca <sub>2</sub> SiO <sub>3</sub> Cl <sub>2</sub> | <i>I4</i>                 | Golovastikov et al. 1977 [56] | -     | no                |
| Ternesite                                        | <i>Pnma</i>               | Irran et al. 1997 [57]        | scX   | >10 wt% sh4       |
| Lime                                             | <i>Fm-3m</i>              | Huang et al. 1994 [58]        | powN  | no                |
| Wollastonite                                     | <i>P12<sub>1</sub>/a1</i> | Hesse 1984 [59]               | scX   | no                |
| Melilite                                         | <i>P-42<sub>1</sub>m</i>  | Merlini 2008 [60]             | scX   | no                |
| Spurrite                                         | <i>P12<sub>1</sub>/a1</i> | Grice 2005 [61]               | scX   | >10 wt% sh4       |
| Brownmillerite                                   | <i>Ibm2</i>               | Colville et al. 1971 [62]     | scX   | no                |
| Ye'elimite                                       | <i>I-43m</i>              | Cuesta et al. 2014 [63]       | powSy | no                |
| Portlandite                                      | <i>P-3m1</i>              | Desgranges et al. 1993 [64]   | scN   | no                |
| Merwinite                                        | <i>P12<sub>1</sub>/a1</i> | Moore et al. 1972 [65]        | scX   | no                |
| Rankinite                                        | <i>P21/a</i>              | Kusachi et al. 1975 [66]      | scX   | no                |
| Bredigite                                        | <i>P2nn</i>               | Moore et al. 1976 [67]        | scX   | no                |

\* OH<sup>-</sup> substituted by Cl<sup>-</sup>

### S2: Calculation of the composition of the amorphous content

For the calculation of the composition of the amorphous content (Table S3), the H<sub>2</sub>O, CO<sub>2</sub>, and SO<sub>3</sub> contents determined from the weight losses in the thermal analysis were used (temperature ranges 30–500 °C, 500–900 °C, and 900–1400 °C). The chlorine content (combustion IC) was subtracted from the amount of SO<sub>3</sub>. All other oxide contents determined by XRF and chlorine measured by combustion IC were normalized to a sum of 100 with the data from thermal analysis (raw data in Table S4). The sums of oxide contents in the crystalline phases (Table S5) were calculated and subtracted from these values. Table 5 summarizes the compositions of the amorphous contents for the raw mixtures and the samples heated to 700–1200 °C. The difference between the sum of all amorphous oxides and the amorphous content determined by XRD ranges between 0.1 and −0.6 wt% for all datasets. The oxide contents in the amorphous part were ascribed to mineral compositions according to the crystalline phases determined in the sample. Chlorine was calculated as CaCl<sub>2</sub>, CO<sub>2</sub> as CaCO<sub>3</sub>, and SO<sub>3</sub> as CaSO<sub>4</sub>. In the high-temperature samples, Fe<sub>2</sub>O<sub>3</sub> was ascribed to low-crystalline brownmillerite. As minor amounts of feldspars were found in the raw materials, Al<sub>2</sub>O<sub>3</sub> was calculated as CaAl<sub>2</sub>Si<sub>2</sub>O<sub>8</sub> in the raw mixtures. The residual amounts of MgO+Al<sub>2</sub>O<sub>3</sub>+Fe<sub>2</sub>O<sub>3</sub> were below 1.0 wt% for most of the samples. Only in the low-temperature data of sample P the residuals that could not be ascribed to phase compositions sum up for higher amounts to the extent of 1.6 wt%. The C/S ratio was calculated for the residual amorphous content. It is ≤2 in all high-temperature samples and <1 in the raw mixtures. Due to the low C/S-ratios C<sub>2</sub>S in the amorphous content for all other high-temperature samples was calculated according to the residual amount of CaO and the existence of amorphous SiO<sub>2</sub> was assumed.

**Table S3.** Composition of the amorphous content in samples D2, P, and D1 heated to different temperatures. Diff.= sum of amorphous oxides-amorphous content XRD, Res = residue of amorphous oxides MgO + Al<sub>2</sub>O<sub>3</sub> + Fe<sub>2</sub>O<sub>3</sub> after subtraction of Al<sub>2</sub>O<sub>3</sub> and Fe<sub>2</sub>O<sub>3</sub> in amorphous brownmillerite and feldspar, C/S-ratio = molar ratio CaO/SiO<sub>2</sub> in amorphous content after subtraction of CaO in amorphous CaCl<sub>2</sub>, CaCO<sub>3</sub>, CaSO<sub>4</sub>, brownmillerite, and feldspar, C<sub>2</sub>S<sub>total</sub> = C<sub>2</sub>S<sub>crystalline</sub>+C<sub>2</sub>S<sub>amorphous</sub>.

| Sample | H <sub>2</sub> O | CO <sub>2</sub> | SO <sub>3</sub> | CaO  | SiO <sub>2</sub> | Fe <sub>2</sub> O <sub>3</sub> | Al <sub>2</sub> O <sub>3</sub> | MgO  | Cl <sup>-</sup> | Diff. | Res  | C/S-ratio | C <sub>2</sub> S <sub>amorph</sub> | C <sub>2</sub> S <sub>total</sub> |
|--------|------------------|-----------------|-----------------|------|------------------|--------------------------------|--------------------------------|------|-----------------|-------|------|-----------|------------------------------------|-----------------------------------|
| D2     |                  |                 |                 |      |                  |                                |                                |      |                 |       |      |           |                                    |                                   |
| 25     | 3.4              | 2.2             | 2.7             | 10.3 | 11.8             | 0.5                            | 1.2                            | 0.4  | 0.9             | -0.2  | 0.9  | 0.4       | -                                  | -                                 |
| 800    | 0.4              | 2.8             | 0.7             | 8.0  | 5.4              | 0.4                            | 0.8                            | 0.1  | -0.4            | -0.3  | 0.2  | 0.7       | 5.4                                | 13.8                              |
| 900    | 0.5              | 0.6             | 1.2             | 3.0  | 5.0              | 0.3                            | 0.3                            | 0.0  | -0.8            | -0.6  | -0.2 | 0.2       | 1.7                                | 27.4                              |
| 950    | 0.5              | 0.8             | 1.8             | 6.7  | 6.4              | 0.4                            | 0.0                            | 0.3  | -0.6            | -0.4  | -0.5 | 0.7       | 6.2                                | 50.0                              |
| 1000   | 0.5              | 0.6             | 0.1             | 7.3  | 4.6              | 0.3                            | 0.2                            | 0.5  | -0.2            | -0.5  | 0.0  | 1.4       | 9.5                                | 57.5                              |
| 1050   | 0.3              | 0.4             | 0.7             | 6.8  | 3.6              | 0.2                            | 0.0                            | 0.4  | -0.2            | -0.3  | 0.1  | 1.7       | 8.7                                | 56.6                              |
| 1100   | 0.2              | 0.2             | 0.7             | 8.1  | 6.3              | 0.5                            | 0.3                            | 0.1  | -0.2            | -0.5  | -0.5 | 1.2       | 10.4                               | 54.1                              |
| P      |                  |                 |                 |      |                  |                                |                                |      |                 |       |      |           |                                    |                                   |
| 25     | 3.2              | 2.0             | 0.9             | 15.0 | 14.5             | 0.7                            | 1.6                            | 0.6  | 0.8             | 0.0   | 1.3  | 0.9       | -                                  | -                                 |
| 700    | 0.5              | 3.2             | 0.1             | 12.0 | 9.1              | 0.3                            | 1.4                            | 0.6  | 0.4             | -0.1  | 1.6  | 0.9       | 11.2                               | 21.4                              |
| 800    | 0.6              | 1.9             | 0.3             | 7.2  | 4.7              | 0.7                            | 0.8                            | 0.5  | 0.4             | -0.3  | 0.1  | 0.8       | 5.6                                | 18.0                              |
| 900    | 0.7              | 1.3             | 0.5             | 8.4  | 4.8              | 0.7                            | 0.6                            | 0.6  | 0.4             | -0.1  | -0.1 | 1.2       | 8.4                                | 56.9                              |
| 1000   | 0.3              | 0.8             | 0.7             | 7.0  | 4.2              | 0.6                            | 0.3                            | 0.7  | 0.2             | -0.1  | 0.0  | 1.2       | 7.2                                | 71.0                              |
| 1100   | 0.4              | 0.5             | 0.6             | 8.4  | 4.9              | 0.8                            | 0.3                            | 0.3  | 0.0             | -0.2  | -0.  | 1.4       | 10.2                               | 65.3                              |
| 1200   | 0.2              | 0.3             | 0.7             | 17.6 | 8.3              | 0.9                            | 1.9                            | -0.3 | -0.3            | -0.3  | 0.11 | 2.0       | 24.3                               | 66.5                              |
| D1     |                  |                 |                 |      |                  |                                |                                |      |                 |       |      |           |                                    |                                   |
| 25     | 4.4              | 2.7             | 0.3             | 9.3  | 10.6             | 0.4                            | 1.0                            | 0.3  | 0.9             | -0.1  | 0.8  | 0.5       | -                                  | -                                 |
| 700    | 0.6              | 2.4             | -0.3            | 7.0  | 5.8              | 0.3                            | 0.8                            | 0.3  | 0.7             | 0.0   | 0.5  | 0.6       | 5.3                                | 11.5                              |
| 800    | 1.3              | 1.8             | 0.0             | 6.0  | 4.5              | 0.4                            | 0.3                            | 0.2  | 0.8             | 0.1   | -0.3 | 0.7       | 4.4                                | 10.7                              |
| 900    | 0.4              | 1.3             | 0.7             | 6.4  | 4.1              | 0.4                            | 0.2                            | 0.3  | 0.8             | 0.1   | -0.3 | 0.9       | 5.1                                | 53.0                              |
| 1000   | 0.3              | 0.6             | 0.7             | 9.9  | 5.3              | 0.4                            | 0.2                            | 0.2  | 0.6             | -0.3  | -0.2 | 1.6       | 12.2                               | 79.9                              |
| 1100   | 0.4              | 0.3             | 0.6             | 9.3  | 5.4              | 0.5                            | 0.2                            | 0.0  | 0.1             | -0.2  | -0.7 | 1.6       | 12.1                               | 76.2                              |
| 1200   | 0.1              | 0.1             | 0.9             | 16.7 | 8.1              | 0.6                            | 1.4                            | -0.2 | -0.4            | -0.2  | 0.2  | 2.0       | 23.5                               | 79.6                              |

**Table S4.** Raw data: Loss of ignition and oxide contents determined by RFA, chlorine contents determined by combustion IC and H<sub>2</sub>O, CO<sub>2</sub>, and SO<sub>3</sub>+Cl determined by thermal analysis. Contents of Na<sub>2</sub>O, K<sub>2</sub>O, and TiO<sub>2</sub> are <0.2 wt%.

| Name    | LoI   | MgO  | Al <sub>2</sub> O <sub>3</sub> | SiO <sub>2</sub> | SO <sub>3</sub> | CaO   | Fe <sub>2</sub> O <sub>3</sub> | Cl <sup>-</sup> | H <sub>2</sub> O(TG) | CO <sub>2</sub> (TG) | SO <sub>3</sub> +Cl(TG) | C/S-ratio |
|---------|-------|------|--------------------------------|------------------|-----------------|-------|--------------------------------|-----------------|----------------------|----------------------|-------------------------|-----------|
| D2_800  | 14.72 | 0.44 | 1.43                           | 26.51            | 5.64            | 49.20 | 0.57                           | 1.29            | 0.39                 | 13.45                | 7.69                    | 1.99      |
| D2_900  | 6.28  | 0.49 | 1.60                           | 29.27            | 6.26            | 54.03 | 0.63                           | 1.39            | 0.50                 | 4.87                 | 8.81                    | 1.98      |
| D2_950  | 1.89  | 0.51 | 1.63                           | 30.55            | 6.49            | 56.20 | 0.65                           | 1.40            | 0.51                 | 0.90                 | 8.96                    | 1.97      |
| D2_1000 | 1.40  | 0.51 | 1.67                           | 30.82            | 6.60            | 56.91 | 0.66                           | 1.35            | 0.45                 | 0.65                 | 7.13                    | 1.98      |
| D2_1050 | 1.23  | 0.52 | 1.66                           | 30.73            | 6.64            | 57.21 | 0.66                           | 1.29            | 0.26                 | 0.52                 | 7.80                    | 1.99      |
| D2_1100 | 1.05  | 0.51 | 1.69                           | 30.93            | 6.64            | 57.30 | 0.66                           | 1.21            | 0.15                 | 0.31                 | 7.81                    | 1.98      |
| P_700   | 17.32 | 0.68 | 1.83                           | 26.70            | 2.35            | 49.00 | 0.79                           | 1.28            | 0.46                 | 16.82                | 3.83                    | 1.97      |
| P_800   | 10.91 | 0.73 | 1.99                           | 28.60            | 2.54            | 52.70 | 0.84                           | 1.34            | 0.57                 | 10.13                | 4.03                    | 1.97      |
| P_900   | 2.38  | 0.80 | 2.16                           | 31.30            | 2.79            | 57.60 | 0.92                           | 1.40            | 0.72                 | 2.34                 | 4.31                    | 1.97      |
| P_1000  | 1.23  | 0.82 | 2.22                           | 32.00            | 2.82            | 58.80 | 0.94                           | 1.29            | 0.31                 | 0.90                 | 4.54                    | 1.97      |
| P_1100  | 0.55  | 0.83 | 2.27                           | 32.10            | 2.82            | 58.80 | 0.94                           | 1.09            | 0.40                 | 0.50                 | 4.15                    | 1.96      |
| P_1200  | 0.47  | 0.83 | 2.25                           | 32.20            | 2.38            | 59.10 | 0.95                           | 0.52            | 0.20                 | 0.32                 | 3.37                    | 1.97      |
| D1_700  | 21.46 | 0.40 | 1.21                           | 26.20            | 0.70            | 48.20 | 0.49                           | 1.22            | 0.57                 | 20.5                 | 1.97                    | 1.97      |
| D1_800  | 12.52 | 0.44 | 1.41                           | 29.30            | 0.79            | 53.80 | 0.56                           | 1.43            | 1.30                 | 11.48                | 2.35                    | 1.97      |
| D1_900  | 4.16  | 0.48 | 1.50                           | 32.20            | 0.86            | 59.10 | 0.61                           | 1.42            | 0.37                 | 3.82                 | 3.00                    | 1.97      |
| D1_1000 | 1.07  | 0.50 | 1.54                           | 33.20            | 0.88            | 60.90 | 0.63                           | 1.34            | 0.25                 | 0.62                 | 2.61                    | 1.97      |
| D1_1100 | 0.71  | 0.50 | 1.56                           | 33.40            | 0.82            | 61.20 | 0.63                           | 0.97            | 0.35                 | 0.39                 | 2.30                    | 1.96      |
| D1_1200 | 0.25  | 0.51 | 1.55                           | 33.40            | 0.62            | 61.30 | 0.63                           | 0.40            | 0.10                 | 0.17                 | 1.82                    | 1.97      |

**Table S5.** Raw data: Phase contents determined by XRD and Rietveld refinement. E.s.d.s of the refinement are given in parentheses. Additional phase contents are  $\leq 1.5$  wt%: brownmillerite;  $\leq 1$  wt%:  $\text{CaCl}_2$ , albite, and microcline;  $< 0.5$  wt%:  $\text{Ca}_2\text{SiO}_3\text{Cl}_2$  and ye'elimite.

| Name    | amorphous | $\beta\text{-C}_2\text{S}$ | $\alpha\text{H-C}_2\text{S}$ | $\gamma\text{-C}_2\text{S}$ | Quartz  | $\text{CaCO}_3$ | Line    | Anhydrite | Ellestadite | Chlormayenite | Rusinovite | Termesite | Spurrite | Rankinit | Mellite | Bredigite | Merwinite | Wollastonite | Rondorfite | GoF  | DW   |
|---------|-----------|----------------------------|------------------------------|-----------------------------|---------|-----------------|---------|-----------|-------------|---------------|------------|-----------|----------|----------|---------|-----------|-----------|--------------|------------|------|------|
| D2_800  | 18.7(9)   | 1.7(2)                     | 6.7(2)                       | 0.53(9)                     | 9.0(1)  | 21.3(2)         | 0.13(5) | 0.58(6)   | 22.1(2)     | 0.84(8)       | 0.8(1)     | 1.0(2)    | 12.9(2)  |          | 0.6(1)  |           | 1.9(2)    | 0.31(7)      | 0.18(6)    | 2.10 | 0.32 |
| D2_900  | 11(1)     | 23.5(4)                    | 2.2(2)                       | 1.1(2)                      | 4.3(4)  | 6.4(1)          | 1.96(5) | 0.6(1)    | 23.2(3)     | 2.3(1)        | 0.3(1)     | 2.4(3)    | 15.2(3)  |          | 1.4(2)  |           | 1.6(2)    | 0.5(1)       | 0.6(1)     | 2.56 | 0.27 |
| D2_950  | 16(1)     | 43.5(4)                    | 0.4(1)                       | 0.4(1)                      | 2.8(3)  | 0.16(5)         | 4.05(5) | 0.69(6)   | 21.1(2)     | 2.95(9)       |            | 2.6(2)    | 0.5(2)   |          | 0.9(1)  |           | 0.8(2)    | 0.2(1)       | 0.2(1)     | 2.00 | 0.32 |
| D2_1000 | 14.1(9)   | 48.0(3)                    |                              | 0.42(6)                     | 3.81(5) |                 | 2.45(4) | 0.66(5)   | 19.4(2)     | 2.60(7)       | 0.6(1)     | 4.7(1)    | 0.6(1)   |          | 0.08(5) |           | 0.19(9)   | 0.5(1)       | 0.2(1)     | 1.74 | 0.43 |
| D2_1050 | 12(1)     | 47.9(4)                    |                              | 0.6(1)                      | 3.59(7) | 0.17(7)         | 0.10(3) | 0.60(6)   | 18.3(2)     | 3.26(8)       | 0.9(1)     | 7.5(2)    | 0.5(1)   | 0.6(2)   | 0.24(6) | 1.0(1)    | 0.4(1)    | 0.5(1)       |            | 1.64 | 0.50 |
| D2_1100 | 16.6(7)   | 43.7(3)                    |                              | 0.61(9)                     | 0.99(5) |                 | 0.13(3) | 0.41(6)   | 17.3(2)     | 2.81(6)       | 0.08(6)    | 10.2(2)   | 0.6(1)   |          | 1.1(1)  | 3.5(1)    |           | 1.1(1)       |            | 1.56 | 0.53 |
| P_700   | 28(1)     | 3.0(2)                     | 7.2(3)                       | 2.0(2)                      | 8.08(8) | 29.0(2)         | 0.03(2) | 1.15(8)   | 7.6(2)      | 0.65(9)       |            |           | 8.4(3)   |          |         |           | 0.3(1)    | 2.3(1)       | 0.7(1)     | 1.88 | 0.40 |
| P_800   | 17.3(8)   | 3.0(2)                     | 9.4(2)                       | 1.8(2)                      | 5.80(6) | 11.7(1)         |         | 0.44(6)   | 8.7(2)      | 2.29(8)       | 1.0(1)     | 0.4(1)    | 31.5(3)  |          | 0.15(5) |           | 1.8(2)    | 3.6(1)       | 0.26(6)    | 1.94 | 0.52 |
| P_900   | 18.0(9)   | 46.2(4)                    | 2.3(2)                       | 1.0(1)                      | 2.88(5) |                 | 0.69(3) | 0.25(3)   | 9.4(2)      | 3.21(9)       | 0.9(1)     | 0.6(2)    | 10.9(2)  |          | 0.35(7) |           | 1.5(2)    | 1.1(1)       |            | 1.53 | 0.49 |
| P_1000  | 15.0(7)   | 63.8(4)                    |                              | 0.68(9)                     | 2.11(4) |                 | 0.17(5) | 0.43(6)   | 9.9(1)      | 3.90(9)       | 0.7(1)     | 0.12(7)   | 0.5(1)   |          | 0.06(5) |           | 0.5(1)    | 0.6(1)       | 0.13(6)    | 1.67 | 0.46 |
| P_1100  | 16.1(6)   | 55.1(4)                    |                              | 0.59(9)                     | 1.38(5) |                 | 0.09(2) | 0.25(3)   | 9.1(1)      | 3.95(7)       | 0.30(9)    | 0.30(8)   | 0.5(1)   |          | 0.26(5) | 7.3(1)    | 0.6(1)    | 2.0(1)       |            | 1.54 | 0.5  |
| P_1200  | 29.5(5)   | 42.1(3)                    |                              | 0.68(8)                     | 0.15(2) |                 | 0.15(3) | 0.30(4)   | 8.3(1)      | 0.55(6)       | 0.77(8)    | 0.20(7)   | 0.27(9)  | 7.7(1)   | 7.08(9) | 1.0(1)    |           | 0.11(3)      |            | 1.52 | 0.58 |
| D1_700  | 17.6(1)   | 1.9(2)                     | 4.3(2)                       | 1.2(2)                      | 11.1(1) | 37.3(3)         | 0.05(3) | 0.51(6)   | 2.5(2)      | 0.56(8)       | 1.3(1)     | 0.8(2)    | 17.3(3)  |          |         |           | 0.4(1)    | 0.8(1)       | 1.6(1)     | 1.89 | 0.44 |
| D1_800  | 15.2(9)   | 2.3(2)                     | 4.0(2)                       | 1.4(2)                      | 6.53(7) | 10.9(1)         |         | 0.39(7)   | 2.4(2)      | 1.93(9)       | 0.26(9)    | 0.7(2)    | 48.9(4)  |          |         |           | 1.4(2)    | 0.9(1)       | 1.49(9)    | 1.84 | 0.39 |
| D1_900  | 14.5(8)   | 46.9(3)                    | 1.0(2)                       | 0.56(7)                     | 2.42(5) |                 |         | 0.43(6)   | 2.4(1)      | 2.65(8)       | 0.5(1)     | 0.4(1)    | 25.1(2)  |          | 0.21(6) |           | 1.2(2)    | 0.18(5)      | 0.38(8)    | 1.68 | 0.53 |
| D1_1000 | 18.2(9)   | 67.7(5)                    |                              | 1.1(1)                      | 1.06(5) |                 | 0.07(2) | 0.34(6)   | 1.5(1)      | 2.58(9)       | 1.8(1)     | 0.16(7)   | 0.3(1)   |          |         |           | 1.2(2)    | 0.4(1)       | 1.99(9)    | 2.03 | 0.4  |
| D1_1100 | 17.0(7)   | 64.1(4)                    |                              | 0.9(1)                      | 0.5(1)  |                 | 0.13(3) | 0.28(4)   | 2.1(1)      | 2.80(7)       | 4.3(1)     | 0.23(8)   | 0.8(1)   | 0.3(1)   | 0.8(1)  | 3.1(1)    | 1.2(1)    | 0.4(1)       |            | 1.82 | 0.47 |
| D1_1200 | 27.4(6)   | 56.1(3)                    |                              | 0.5(1)                      |         |                 | 0.10(2) | 0.41(5)   | 1.2(1)      | 0.23(7)       | 7.4(1)     | 0.14(6)   | 0.24(9)  | 0.5(1)   | 4.41(9) |           | 0.20(9)   | 0.05(3)      |            | 1.69 | 0.56 |

### S3: Calculation of the yield for CaO in C<sub>2</sub>S and ellestadite

The amounts of crystalline and non-crystalline C<sub>2</sub>S, as well as ellestadite, were normalized to the loss of ignition of the raw samples before high-temperature treatment. The yield was calculated from these values according to the equation given in the main part of the paper. The reasonability of these results was proven by the calculation of the yield of all other crystalline and non-crystalline phases and by the addition of these values to the yields of C<sub>2</sub>S and ellestadite. All sums vary between 0.98 and 1.01, which proves the reasonability of the calculations.

**Table S6.** Calculation of the yield of the products C<sub>2</sub>S and ellestadite and mass balance calculation for CaO in other crystalline and amorphous phases. Phase amounts C<sub>2</sub>S<sub>cry</sub>, C<sub>2</sub>S<sub>tot</sub> and ellestadite are normalized to the loss of ignition of the raw material, Yield Prod. = sum of the yields of these phases, Sum Other = sum of the yield of all other crystalline and amorphous phases, Sum Total = sum prod.+sum other.

| Sample | C <sub>2</sub> S <sub>cry</sub> | C <sub>2</sub> S <sub>tot</sub> | Ellestadite | Yield C <sub>2</sub> S <sub>cry</sub> | Yield C <sub>2</sub> S <sub>tot</sub> | Yield Ellest. | Yield Prod. | Sum Other | Sum Total |
|--------|---------------------------------|---------------------------------|-------------|---------------------------------------|---------------------------------------|---------------|-------------|-----------|-----------|
| D2     |                                 |                                 |             |                                       |                                       |               |             |           |           |
| 800    | 7.13                            | 11.67                           | 18.77       | 0.11                                  | 0.18                                  | 0.24          | 0.42        | 0.57      | 1.00      |
| 900    | 19.86                           | 21.19                           | 17.93       | 0.31                                  | 0.33                                  | 0.23          | 0.56        | 0.43      | 0.99      |
| 950    | 32.31                           | 36.88                           | 15.58       | 0.50                                  | 0.57                                  | 0.20          | 0.78        | 0.21      | 0.99      |
| 1000   | 35.26                           | 42.20                           | 14.21       | 0.55                                  | 0.66                                  | 0.18          | 0.84        | 0.17      | 1.01      |
| 1050   | 35.13                           | 41.50                           | 13.43       | 0.55                                  | 0.65                                  | 0.17          | 0.82        | 0.18      | 1.00      |
| 1100   | 31.99                           | 39.60                           | 12.63       | 0.50                                  | 0.62                                  | 0.16          | 0.78        | 0.22      | 1.00      |
| P      |                                 |                                 |             |                                       |                                       |               |             |           |           |
| 700    | 9.16                            | 19.25                           | 6.84        | 0.13                                  | 0.28                                  | 0.08          | 0.37        | 0.61      | 0.98      |
| 800    | 10.34                           | 15.03                           | 7.24        | 0.15                                  | 0.22                                  | 0.09          | 0.31        | 0.67      | 0.98      |
| 900    | 36.89                           | 43.31                           | 7.15        | 0.54                                  | 0.64                                  | 0.09          | 0.72        | 0.26      | 0.98      |
| 1000   | 47.97                           | 53.36                           | 7.41        | 0.71                                  | 0.78                                  | 0.09          | 0.88        | 0.11      | 0.99      |
| 1100   | 41.14                           | 48.78                           | 7.32        | 0.61                                  | 0.72                                  | 0.09          | 0.81        | 0.18      | 0.99      |
| 1200   | 31.43                           | 49.58                           | 6.16        | 0.46                                  | 0.73                                  | 0.08          | 0.80        | 0.19      | 1.00      |
| D1     |                                 |                                 |             |                                       |                                       |               |             |           |           |
| 700    | 5.42                            | 10.01                           | 2.14        | 0.08                                  | 0.15                                  | 0.03          | 0.18        | 0.81      | 0.99      |
| 800    | 4.94                            | 8.38                            | 1.87        | 0.08                                  | 0.13                                  | 0.02          | 0.15        | 0.83      | 0.98      |
| 900    | 34.26                           | 37.91                           | 1.69        | 0.53                                  | 0.58                                  | 0.02          | 0.60        | 0.38      | 0.98      |
| 1000   | 46.94                           | 55.37                           | 1.04        | 0.72                                  | 0.85                                  | 0.01          | 0.86        | 0.12      | 0.98      |
| 1100   | 44.29                           | 52.63                           | 1.48        | 0.68                                  | 0.81                                  | 0.02          | 0.83        | 0.16      | 0.99      |
| 1200   | 38.58                           | 54.75                           | 0.82        | 0.59                                  | 0.84                                  | 0.01          | 0.85        | 0.14      | 1.00      |
